# Supplementary material for: Performance of Salivary Extracellular RNA Biomarker Panels for Gastric Cancer Differs between Distinct Populations
Source: MDPI journal article supplement (doi:10.3390/cancers14153632), 2022-07-26
Supplement: s1 [file s1]

## Supplementary material

**Supplementary Table S1.** The list of mRNA biomarker candidates and primer sequences used for validation.

| Gene Symbol | Accession No | Primer Sequence (5' to 3')                                                                                             | Amplicon Size* (bp) |
|-------------|--------------|------------------------------------------------------------------------------------------------------------------------|---------------------|
| PPL         | NM_002705.4  | OF:GGAAACAAAGGCAAATACAGC<br>OR:TGTGTCCACGATGTTCTTCTC<br>IF:CCGGAGCATCTCTAACAAGGA<br>IR:ACCTGGTCGGCATTCTTCTG            | 66                  |
| SEMA4B      | NM_198925.2  | OF:CAGCCTCTACCAGCCTCA<br>OR:CTGGAACCTGGACTTGCTCA<br>IF:ATCCAGGACATCGAGGGAGC<br>IR:GTTGGTACAAAAGACGGGGAC                | 77                  |
| SPINK7      | NM_032566.2  | OF:CCTGCCCATCACATACCTA<br>OR:AGAGCCTGGGATGATGAAGAT<br>G<br>IF:CATCACCTATGGGAATGAATGTC<br>IR:TCCATCGTGAAGAACTGAACT<br>C | 79                  |
| GAPDH #     | NM_002046.4  | OF:CAACAGCCTCAAGATCATCA<br>OR:CCATCACGCCACAGTTTC<br>IF:CCAACCTGCTTAGCACCCCTG<br>IR:GGGCCATCCACAGTCTTCTG                | 112                 |
| ACTB #      | NM_001101.3  | CAGAGCCTCGCCTTTGCC<br>ATGCCGGAGCCGTTGTCG<br>CCTCGCCTTTGCCGATCC<br>GAGCGCGGCGATATCATCA                                  | 73                  |

Abbreviations: O, outer; I, inner; F, forward; R, reverse.\* The amplicon size is the nested PCR product size using IF+IR primers. # Saliva internal reference (SIR) gene.

# Performance of miRNA and mRNA biomarkers for GC - Comparison between Korean and U.S. (MDA Anderson cohort)

| Gene             | GC (n = 100) vs non-GC control (n = 100) $\Delta$ Cq |                   |                      |                   |
|------------------|------------------------------------------------------|-------------------|----------------------|-------------------|
|                  | GC, mean (SD)                                        | Non-GC, mean (SD) | P value <sup>a</sup> | AUC (95% CI)      |
| <i>ANXA1</i>     | -2.58 (2.07)                                         | -3.36 (1.63)      | 0.008                | 0.61 (0.53, 0.69) |
| <i>CD24</i>      | 1.20 (1.90)                                          | 0.32 (1.66)       | 0.001                | 0.63 (0.56, 0.71) |
| <i>CSTB</i>      | -2.83 (2.15)                                         | -3.74 (1.79)      | 0.004                | 0.62 (0.54, 0.70) |
| <i>EIF3G</i>     | 6.98 (3.08)                                          | 7.08 (3.21)       | 0.945                | 0.50 (0.42, 0.58) |
| <i>ERO1A</i>     | 4.53 (2.07)                                          | 3.70 (1.96)       | 0.002                | 0.63 (0.55, 0.71) |
| <i>KRT4</i>      | -2.28 (2.35)                                         | -3.02 (2.00)      | 0.035                | 0.59 (0.51, 0.67) |
| <i>KRT6A</i>     | -0.34 (2.34)                                         | -1.21 (2.15)      | 0.001                | 0.63 (0.56, 0.71) |
| <i>PPL</i>       | 1.08 (2.23)                                          | 0.34 (2.20)       | 0.007                | 0.61 (0.53, 0.69) |
| <i>RANBP9</i>    | 4.26 (3.11)                                          | 3.56 (2.77)       | 0.157                | 0.56 (0.48, 0.64) |
| <i>SI00A10</i>   | 2.21 (2.02)                                          | 1.55 (2.04)       | 0.006                | 0.61 (0.54, 0.69) |
| <i>SEMA4B</i>    | 11.47 (3.98)                                         | 10.57 (4.14)      | 0.149                | 0.56 (0.48, 0.64) |
| <i>SPINK7</i>    | 2.37 (2.72)                                          | 1.18 (1.98)       | 0.001                | 0.64 (0.56, 0.72) |
| <i>MIR140-5p</i> | 1.54 (3.68)                                          | -1.08 (3.27)      | <0.001               | 0.70 (0.63, 0.78) |
| <i>MIR374a</i>   | 6.95 (5.69)                                          | 4.26 (4.59)       | <0.001               | 0.65 (0.57, 0.73) |
| <i>MIR454</i>    | 4.61 (3.40)                                          | 3.14 (3.40)       | 0.003                | 0.63 (0.55, 0.70) |
| <i>MIR15b</i>    | 2.92 (3.52)                                          | 1.00 (3.42)       | <0.001               | 0.65 (0.57, 0.72) |
| <i>MIR28-5p</i>  | 5.15 (4.17)                                          | 3.59 (3.94)       | 0.024                | 0.59 (0.51, 0.67) |
| <i>MIR301a</i>   | 8.46 (4.17)                                          | 6.95 (3.82)       | 0.01                 | 0.61 (0.53, 0.69) |

<sup>a</sup> All 15 biomarker candidates with  $P < 0.05$  have q values (FDR-adjusted  $P$  values) of also  $< 0.05$ .

Table 1. Performance of miRNAs & mRNAs in Korean cohort [Feng Li et al 2018].

| mRNAs & miRNAs for GC Control (n=49) | Case (n=51)  | p-value      | test                          |
|--------------------------------------|--------------|--------------|-------------------------------|
| miR140                               | 16.15 (2.67) | 16.07 (2.62) | 0.880 / 0.758 Wilcox / t-test |
| miR301                               | 20.65 (2.45) | 20.12 (2.60) | 0.297 / 0.181 Wilcox / t-test |
| U6                                   | 15.37 (2.64) | 15.53 (2.70) | 0.776 / 0.809 Wilcox / t-test |
| miR197                               | 16.20 (1.82) | 16.19 (1.85) | 0.998 / 0.796 Wilcox / t-test |
| dCTmiR140_U6                         | 0.78 (2.41)  | 0.54 (1.74)  | 0.580 / 0.769 Wilcox / t-test |
| dCTmiR140_197                        | -0.05 (1.45) | -0.13 (1.24) | 0.769 / 0.969 Wilcox / t-test |
| dCTmiR140_Both                       | 0.41 (1.73)  | 0.24 (1.16)  | 0.578 / 0.779 Wilcox / t-test |
| dCTmiR301_U6                         | 5.28 (2.34)  | 4.59 (1.74)  | 0.100 / 0.361 Wilcox / t-test |
| dCTmiR301_197                        | 4.45 (1.49)  | 3.92 (1.27)  | 0.058 / 0.059 Wilcox / t-test |
| dCTmiR301_Both                       | 4.91 (1.70)  | 4.29 (1.19)  | 0.038 / 0.136 Wilcox / t-test |
| geomeanBoth                          | 15.74 (2.04) | 15.83 (2.11) | 0.841 / 0.856 Wilcox / t-test |
| PPL                                  | 21.72 (2.74) | 22.01 (3.86) | 0.997 / 0.673 Wilcox / t-test |
| SPINK7                               | 23.98 (2.68) | 24.58 (3.89) | 0.533 / 0.369 Wilcox / t-test |
| SEMA4B                               | 30.92 (2.81) | 30.68 (3.13) | 0.966 / 0.690 Wilcox / t-test |
| ACTB                                 | 17.96 (3.04) | 18.39 (4.49) | 0.905 / 0.578 Wilcox / t-test |
| GAPDH                                | 25 (2.53)    | 24.83 (3.19) | 0.845 / 0.765 Wilcox / t-test |
| PPL_ACTB                             | 3.77 (2.09)  | 3.62 (2.08)  | 0.825 / 0.729 Wilcox / t-test |
| SPINK7_ACTB                          | -3.27 (2.5)  | -2.81 (2.83) | 0.403 / 0.393 Wilcox / t-test |
| SEMA4B_ACTB                          | 12.94 (1.48) | 12.32 (2.23) | 0.315 / 0.112 Wilcox / t-test |
| PPL_GAPDH                            | -3.27 (2.5)  | -2.81 (2.83) | 0.403 / 0.393 Wilcox / t-test |
| SPINK7_GAPDH                         | 17.96 (3.04) | 18.39 (4.49) | 0.905 / 0.578 Wilcox / t-test |
| SEMA4B_GAPDH                         | 5.93 (1.98)  | 5.81 (2.19)  | 0.721 / 0.778 Wilcox / t-test |

Table 2. Performance of miRNAs & mRNAs in U.S. MD Anderson cohort.

**Supplementary Figure S1.** Comparison of miRNA & mRNA biomarker performance for GC between Korean and U.S. MDA Anderson Cancer Center study groups.
